# Supplementary material for: How do pregnant women’s perceptions of obstetric forceps change according to their demographic background: a cross sectional study
Source: Springer Nature journal article supplement (doi:10.1186/s12884-021-03854-x), 2021-05-11
Supplement: MOESM1 [file 19154646]

## MATERNAL ATTITUDES ABOUT FORCEPS SURVEY

1. Age \_\_\_\_\_

2. Ethnicity

|         |            |                    |         |
|---------|------------|--------------------|---------|
| 1 white | 2 Hispanic | 3 African-American | 4 Other |
|---------|------------|--------------------|---------|

3. Highest level of education completed \_\_\_\_\_

4. Insurance level

|                |                     |                   |
|----------------|---------------------|-------------------|
| 1 self-insured | 2 private insurance | 3 Medicaid/public |
|----------------|---------------------|-------------------|

Attitude –

1. Do you think forceps should be used to deliver babies?

|     |    |
|-----|----|
| YES | NO |
|-----|----|

2. Is forceps safe for the baby?

|         |             |           |          |          |
|---------|-------------|-----------|----------|----------|
| 1 Never | 2 Sometimes | 3 Neutral | 4 Mostly | 5 Always |
|---------|-------------|-----------|----------|----------|

3. Is forceps safe for the mother?

|         |             |           |          |          |
|---------|-------------|-----------|----------|----------|
| 1 Never | 2 Sometimes | 3 Neutral | 4 Mostly | 5 Always |
|---------|-------------|-----------|----------|----------|

4. Do you think forceps can help to lower the cesarean section rate?

|     |    |
|-----|----|
| YES | NO |
|-----|----|

5. Do you think training physicians should learn to place forceps on a real patient?

|     |    |
|-----|----|
| YES | NO |
|-----|----|
